# Supplementary material for: Enhancing visible-light photocatalytic activity of g-C3N4by doping phosphorus and coupling with CeO2for the degradation of methyl orange under visible light irradiation
Source: Royal Society of Chemistry journal article supplement (doi:10.1039/c5ra10848a), 2015-01-01
Supplement: c5ra10848a1.pdf [file c5ra10848a1.pdf]

## Supporting information

### **Enhancing visible-light photocatalytic activity of g-C<sub>3</sub>N<sub>4</sub> by doping phosphorus and coupling with CeO<sub>2</sub> for the degradation of methyl orange under visible light irradiation**

*Jin Luo,\* Xiaosong Zhou, Lin Ma, Xuyao Xu*

School of Chemistry and Chemical Engineering, Institute of Physical Chemistry, and  
Development Center for New Materials Engineering & Technology in Universities of  
Guangdong, Lingnan Normal University, Zhanjiang 524048, China

E-mail: [lj328520504@126.com](mailto:lj328520504@126.com)

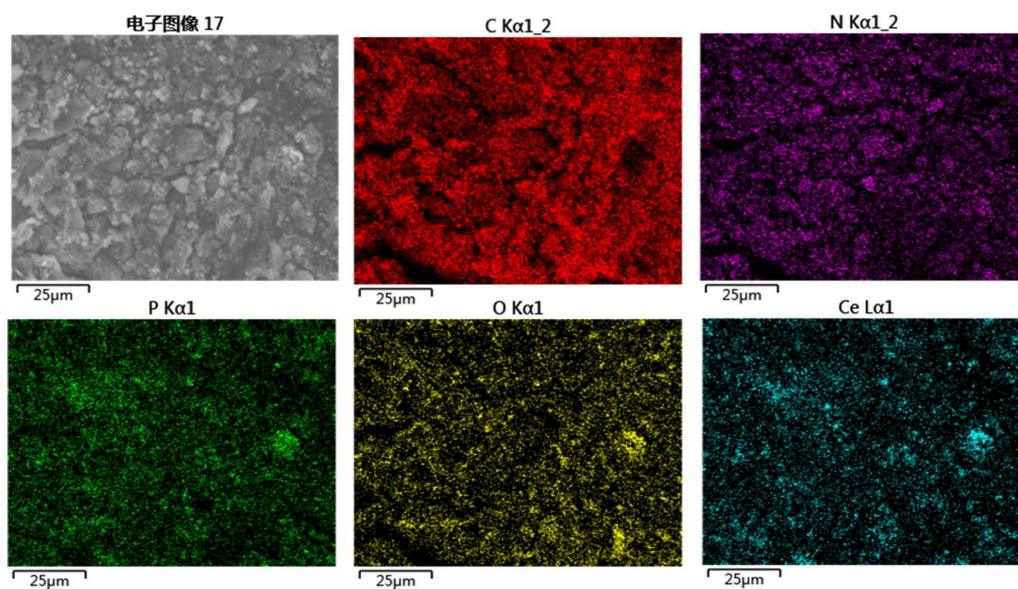

Fig. S1. The elemental mapping image of  $\text{CeO}_2(13.8\%)/\text{P-C}_3\text{N}_4$ .

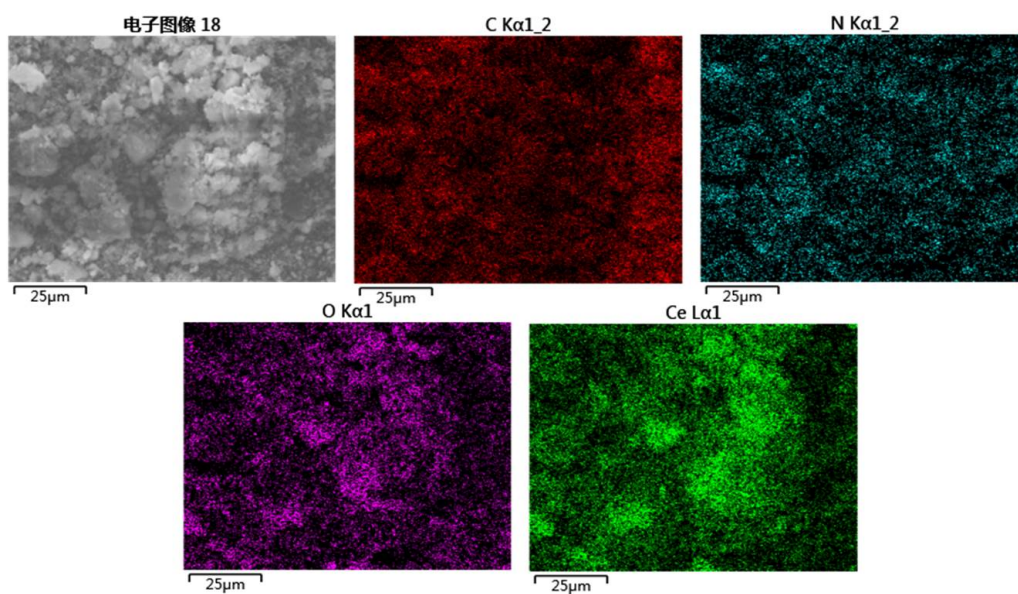

Fig. S2. The elemental mapping image of  $\text{CeO}_2(13.8\%)/\text{g-C}_3\text{N}_4$ .

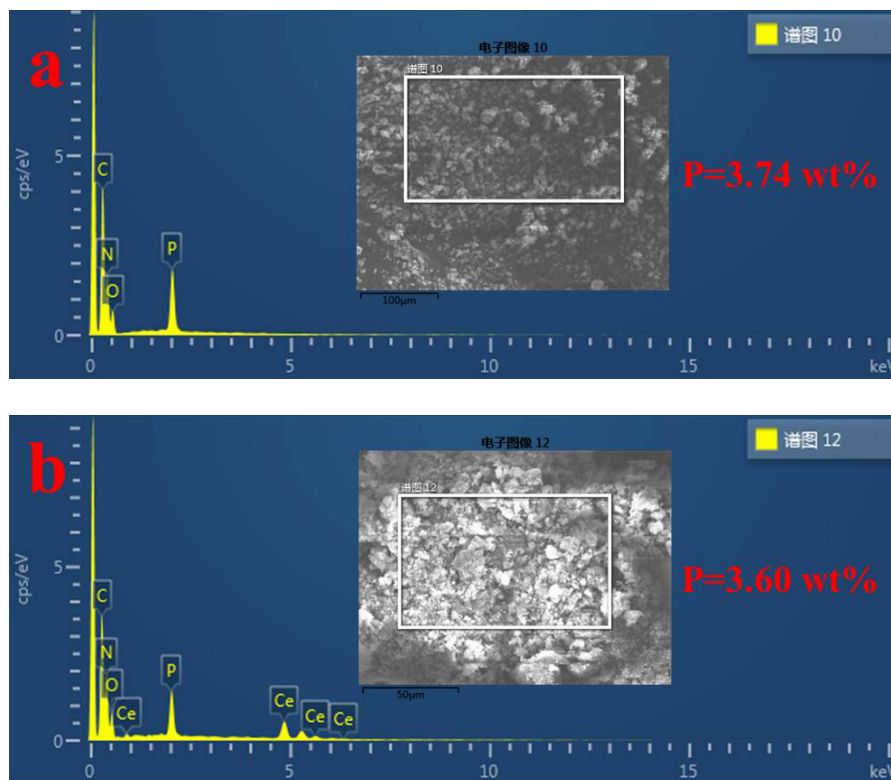

Fig. S3. The EDS of P-C<sub>3</sub>N<sub>4</sub> (a) and CeO<sub>2</sub>(13.8%)/P-C<sub>3</sub>N<sub>4</sub> (b).

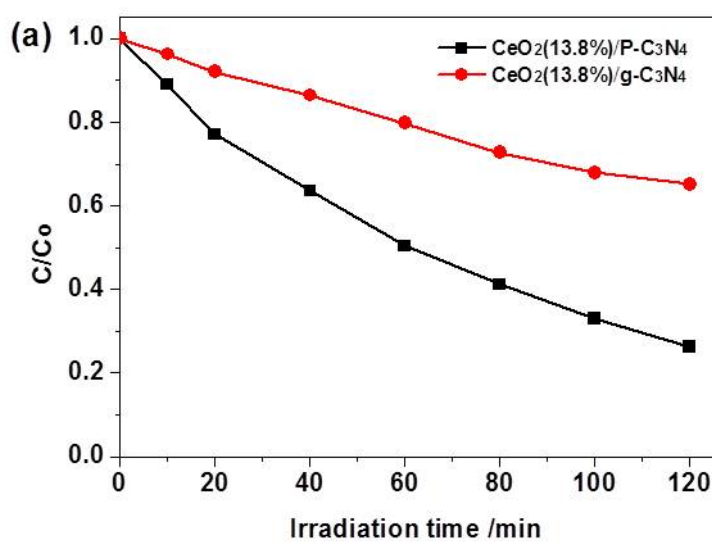

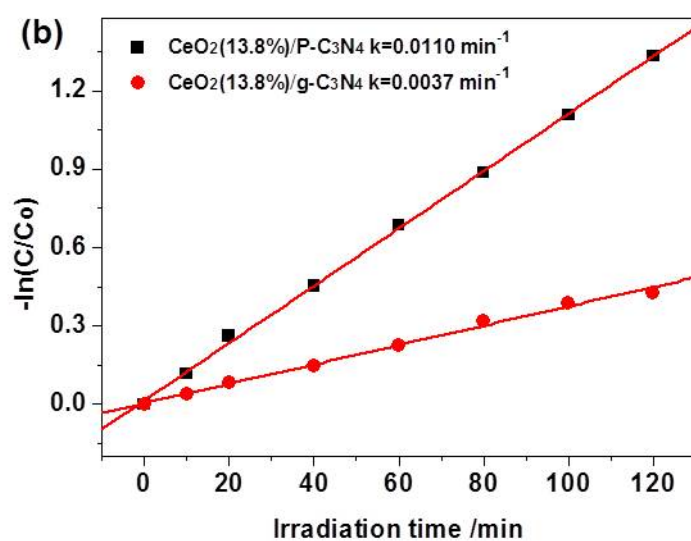

Fig. S4. Photocatalytic activities (a) and first-order kinetics plot (b) of  $\text{CeO}_2(13.8\%)/\text{P-C}_3\text{N}_4$  and  $\text{CeO}_2(13.8\%)/\text{g-C}_3\text{N}_4$  for the photodegradation of MO in aqueous solution under visible light irradiation.

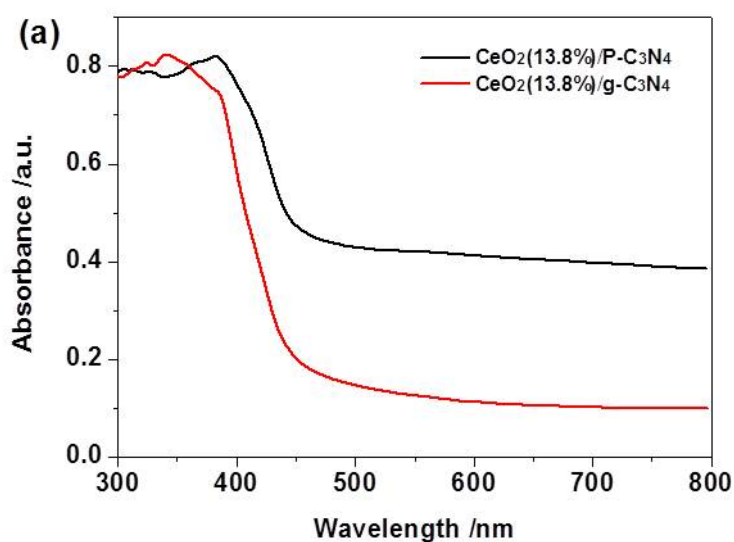

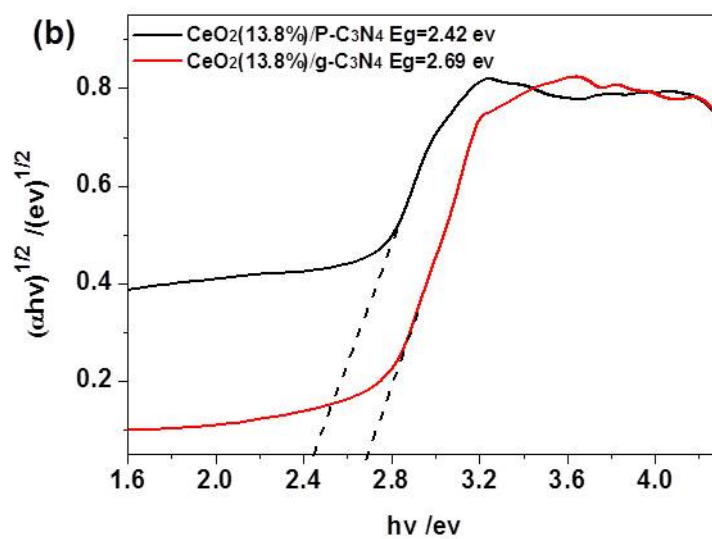

Fig. S5. UV-vis DRS (a) and plots of  $(\alpha h\nu)^{1/2}$  vs. photon energy (b) of  $\text{CeO}_2(13.8\%)/\text{P-C}_3\text{N}_4$  and  $\text{CeO}_2(13.8\%)/\text{g-C}_3\text{N}_4$ .

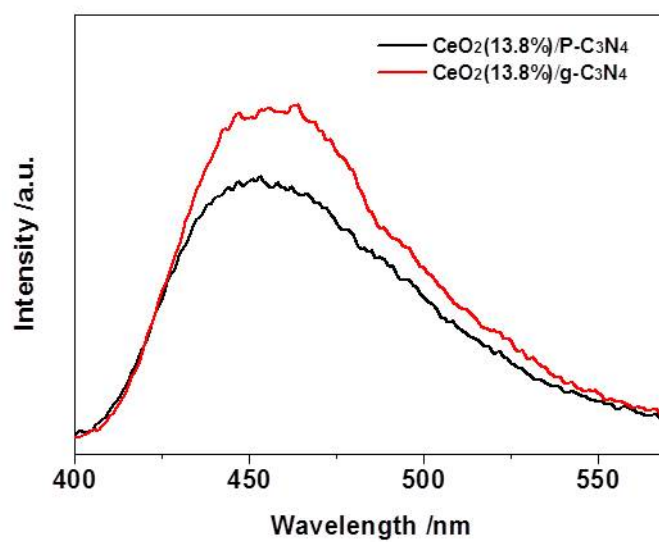

Fig. S6. PL spectra (a) of  $\text{CeO}_2(13.8\%)/\text{P-C}_3\text{N}_4$  and  $\text{CeO}_2(13.8\%)/\text{g-C}_3\text{N}_4$ .
